# Supplementary material
Source: publisher figshare collection journal article supplement (https://future-science-group.figshare.com/ndownloader/files/35011849)
Supplement: Supplementary file 1 [file 35011849]

Supplementary data: Translated survey.


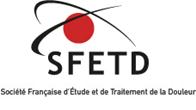


Survey on the actions carried out or modification of the activity of the actors of the care of the pain since the release of the State of Health Emergency

**1/ team missions : this survey had to be individually completed in order to identify each responder**

Identity of the structure : region, city, name

Identity of the professional : physician (specialty), nurse, psychologist, secretary, other

Date of survey completion

**Question regarding your work**

Could you stay at your initial position ? Yes/No

Were you volunteer to be reallocated? Yes/No

Did you work in a COVID medical unit ? Yes/No

Did you work in a COVID ICU ? Yes/No

Did you work in an operating room ? Yes/No

Did you join an non-COVID ICU ? Yes/No

Did you join a nursing home? Yes/No

Did you join a palliative care unit ? Yes/No

Did you join a non-COVID medical or surgical unit ? Yes/No

Did you volunteer in sanitary reserve? Yes/No

Did you work for emergency medical services? Yes/No

Did you participate to a family listening group ? Yes/No

Did you participate to a caregivers listening group ? Yes/No

Were you invited to stay home waiting for an affectation? Yes/No

Were you authorized to stay home for personal reasons ? Yes/No

Were you on-call or round-o-clock ? Yes/No

Were you part of a structure newly created for the crisis
(and not previously mentioned) ? Yes/No

If yes, which one? _________________________________

**2/ What strategies did you develop to follow-up on patients in your CPS**

Did you maintain in-person appointments? Yes/No

If yes, for which patients and according to which criteria ____________________

Did you develop teleconsultation? Yes/No

If yes

By phone ? Yes/No

Using a teleconsultation software ? Yes/No

For all patients Yes/No

For patients with specific criteria ? give an example Yes/No

For new patients ? Yes/No

For patients who specifically asked for it? Yes/No

For those who did not previously use telemedecine using phone calls before the crisis and started to use it, what is your opinion on this tool ?

It was precious Yes/No

It was useful but not exceptional Yes/No

It had no interest Yes/No

What is your opinion on telemedicine using phone calls?

(Please give you general opinion between 0 : no interest and 10 : major interest)

Were you able to maintain hospital day? Yes/No

If yes, for which patients ? ___________________________________

What is your estimation of the impact of the crisis on patients? Between 0 : no impact and 10 : major impact

At the time of your answer, is the workforce of your CPS team restored? Yes/No

If only restoration is still partial please fill the information below :

Restoration percentage: ___________________

Restoration (indicate %) of

Physician

Pain nurse

Psychologist

Secretary

other (give details)

What was the mean delay for a consultation before the crisis? In months: __________

What is the mean delay for a consult now since the crisis ? In months: ____________

Has the crisis deeply transformed your way of working ? Yes / No

If yes, how ? _______________________________________________________________

**3/ Supply issues for drugs and medical devices**

Did you notice supply issues for drugs ? Yes / No

If yes, which ones ? _________________________________________________________

Were you obliged to change the treatment of your patients during the crisis ? Yes / No

If yes, which ones ? _________________________________________________________

Did you notice supply issues for medical devices ? Yes / No

If yes, which ones ? _________________________________________________________
